# Supplementary material
Source: PubMed Central journal article supplement (PMC3977188)

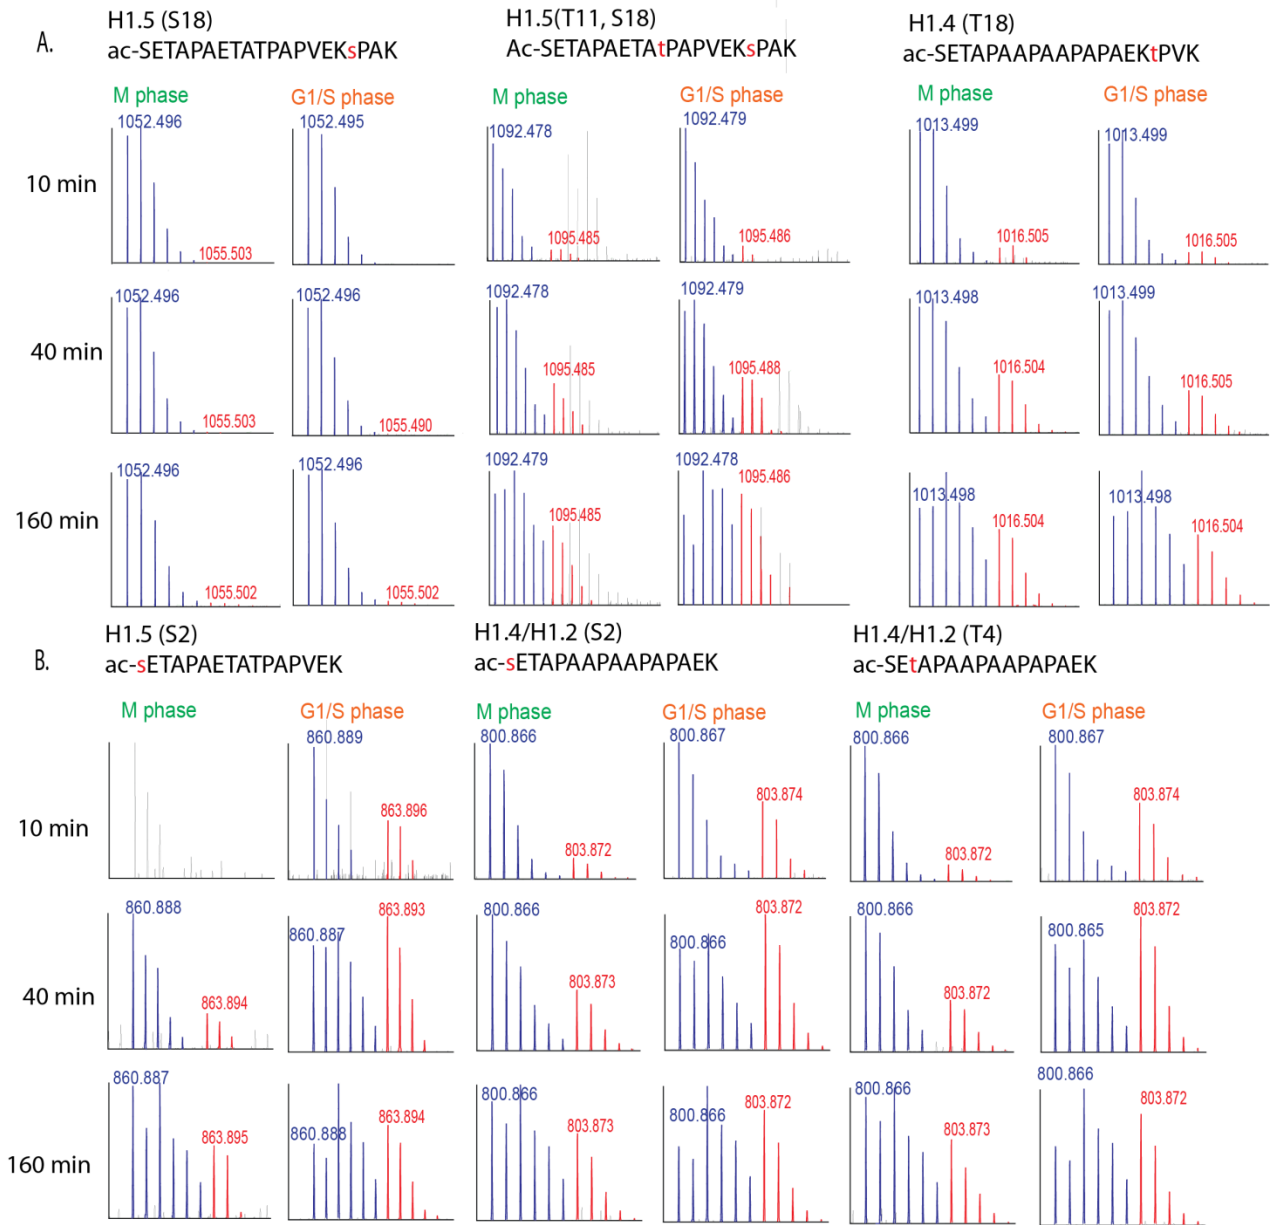

Supplementary Figure 5

Supplement: supp_O113.036145_1.pdf [file supp_O113.036145_1.pdf]

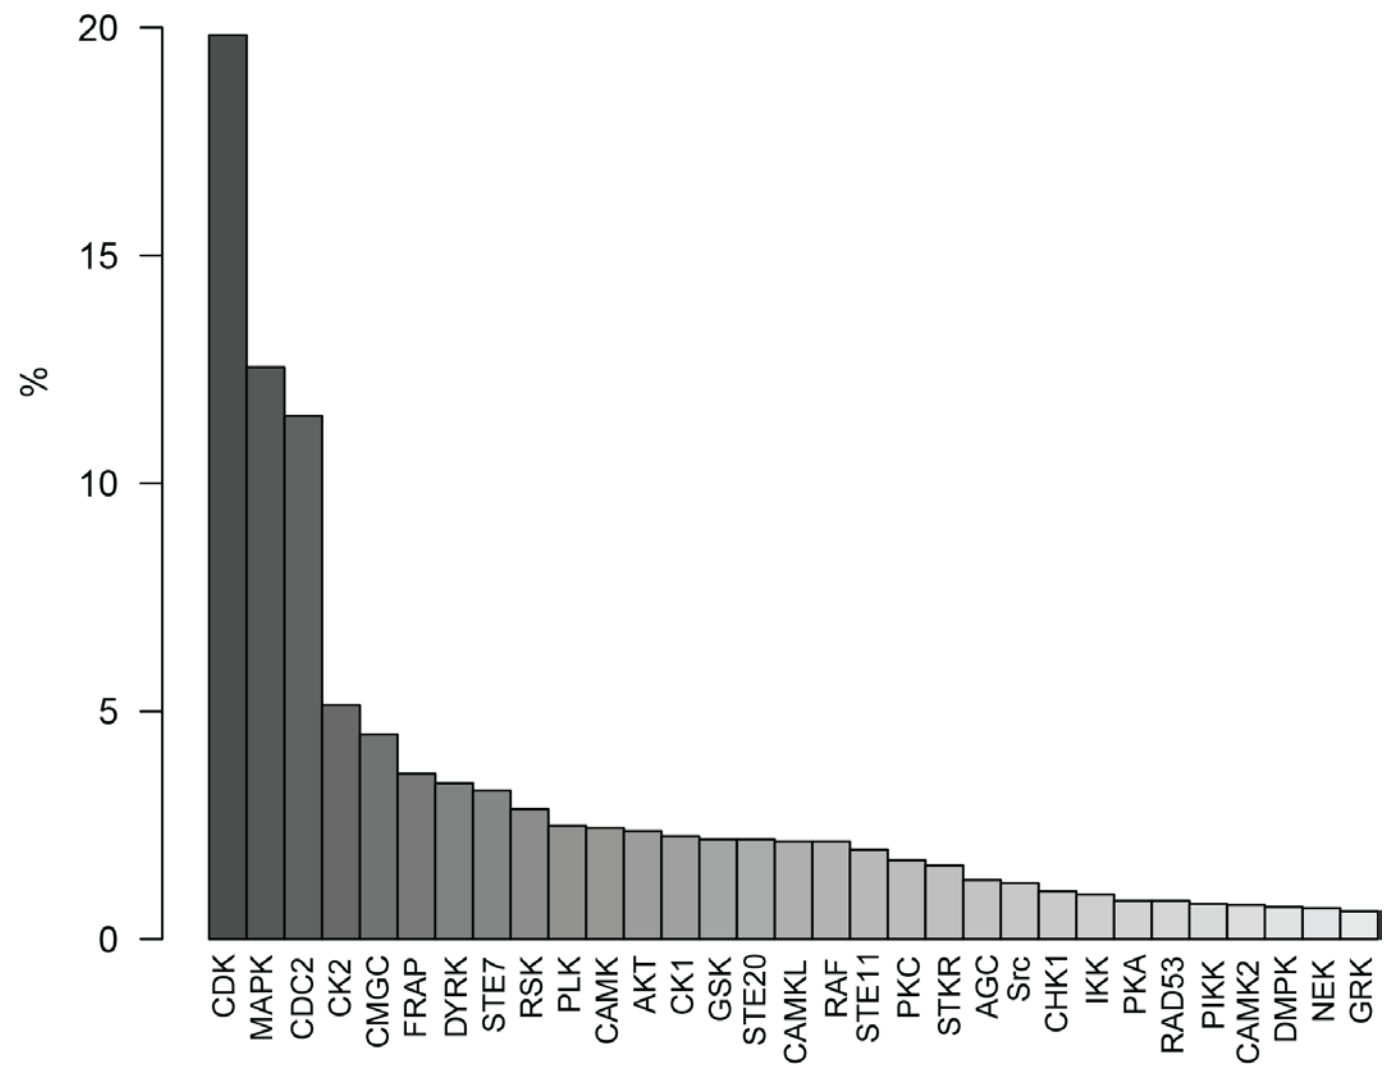

Supplementary Figure 3

Supplement: supp_O113.036145_mcp.O113.036145-4.pdf [file supp_O113.036145_mcp.O113.036145-4.pdf]

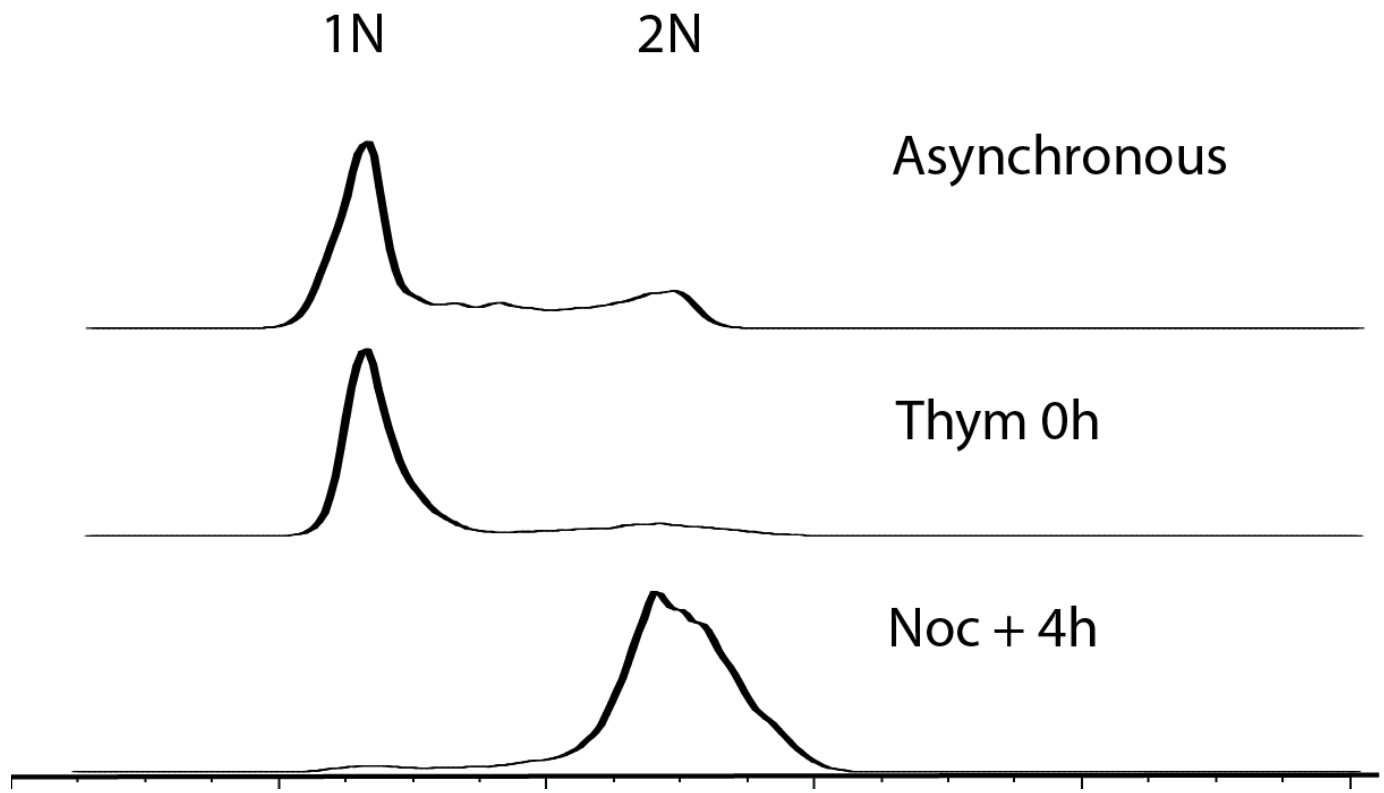

Supplementary Figure 4

Supplement: supp_O113.036145_mcp.O113.036145-5.pdf [file supp_O113.036145_mcp.O113.036145-5.pdf]
